# Supplementary material for: Molecular Profiling of Premalignant Lesions in Lung Squamous Cell Carcinomas Identifies Mechanisms Involved in Stepwise Carcinogenesis
Source: Oxford University Press journal article supplement (doi:10.1158/1940-6207.capr-13-0372), 2014-03-11
Supplement: 19406207capr130372-sup-tab4.xlsx [file 19406207capr130372-sup-tab4.xlsx]

## Sheet: Sheet1
Supplementary Table S4
Category	Functions Annotation	p-Value	Predicted Activation State	Activation z-score	# of Genes in Functions	Stage of Carcinogenesis
Post-Translational Modification	ubiquitination	2.18e-05	Increased	2.621	22	Early
Post-Translational Modification	ubiquitination of protein	4.45e-05	Increased	2.425	21	Early
Cell Death and Survival	cell viability of tumor cell lines	4.95e-05	Increased	4.662	45	Early
Cellular Growth and Proliferation	proliferation of cells	0.00025	Increased	4.512	165	Early
Cell Cycle	M phase	0.000274	Increased	2.205	18	Early
Cellular Growth and Proliferation	proliferation of tumor cell lines	0.000277	Increased	3.626	76	Early
Cellular Development	proliferation of tumor cell lines	0.000277	Increased	3.626	76	Early
Cell Cycle	cytokinesis of cervical cancer cell lines	0.000314	Increased	2.219	7	Early
Cellular Movement	cytokinesis of cervical cancer cell lines	0.000314	Increased	2.219	7	Early
Cell Death and Survival	cell viability of cervical cancer cell lines	0.000337	Increased	3.487	17	Early
Infectious Disease	infection of embryonic cell lines	0.000439	Increased	3.811	22	Early
Organismal Injury and Abnormalities	infection of embryonic cell lines	0.000439	Increased	3.811	22	Early
Dermatological Diseases and Conditions	infection of epithelial cell lines	0.000439	Increased	3.811	22	Early
Infectious Disease	infection of epithelial cell lines	0.000439	Increased	3.811	22	Early
Embryonic Development	size of embryo	0.0005	Increased	4.347	24	Early
Cell Death and Survival	cell death	0.000511	Decreased	-2.367	154	Early
Cell Death and Survival	cell viability	0.000649	Increased	3.823	65	Early
Infectious Disease	infection of kidney cell lines	0.000717	Increased	3.81	22	Early
Renal and Urological Disease	infection of kidney cell lines	0.000717	Increased	3.81	22	Early
Cell Death and Survival	cell survival	0.000743	Increased	3.405	69	Early
Cell Signaling	activation of enzyme	0.000836	Increased	2.828	8	Early
Cellular Movement	migration of muscle cell lines	0.00105	Increased	2.2	5	Early
DNA Replication, Recombination, and Repair	repair of DNA	0.00151	Increased	2.343	18	Early
Infectious Disease	infection of cells	0.00162	Increased	5.609	49	Early
Cellular Assembly and Organization	organization of cytoplasm	0.0019	Increased	2.874	68	Early
Cellular Function and Maintenance	organization of cytoplasm	0.0019	Increased	2.874	68	Early
Cell Death and Survival	necrosis	0.00198	Decreased	-2.164	118	Early
Cell Cycle	cytokinesis	0.00239	Increased	2.408	12	Early
Cellular Movement	cytokinesis	0.00239	Increased	2.408	12	Early
Cell Cycle	interphase	0.00277	Increased	2.335	39	Early
Cell Death and Survival	cell death of tumor cell lines	0.00347	Decreased	-2	70	Early
Embryonic Development	death of embryo	0.00364	Decreased	-2	5	Early
Organismal Survival	death of embryo	0.00364	Decreased	-2	5	Early
Infectious Disease	Viral Infection	0.00395	Increased	6.142	84	Early
DNA Replication, Recombination, and Repair	breakage of DNA	0.00822	Decreased	-2.236	5	Early
Protein Synthesis	polymerization of protein	0.00977	Increased	2.164	18	Early
Infectious Disease	infection by HIV-1	0.0107	Increased	5.238	36	Early
DNA Replication, Recombination, and Repair	hydrolysis of GTP	0.0171	Increased	2.219	6	Early
Nucleic Acid Metabolism	hydrolysis of GTP	0.0171	Increased	2.219	6	Early
Small Molecule Biochemistry	hydrolysis of GTP	0.0171	Increased	2.219	6	Early
Cell Signaling	hydrolysis of GTP	0.0171	Increased	2.219	6	Early
Hematological Disease	anemia	0.0178	Decreased	-2	18	Early
Infectious Disease	infection by Retroviridae	0.0181	Increased	5.417	39	Early
Infectious Disease	HIV infection	0.0204	Increased	5.324	38	Early
Cell Cycle	G1 phase	0.0256	Increased	2.563	22	Early
Nucleic Acid Metabolism	synthesis of purine nucleotide	0.0258	Increased	2.2	10	Early
Small Molecule Biochemistry	synthesis of purine nucleotide	0.0258	Increased	2.2	10	Early
Cellular Assembly and Organization	microtubule dynamics	0.0279	Increased	2.807	49	Early
Cellular Function and Maintenance	microtubule dynamics	0.0279	Increased	2.807	49	Early
Skeletal and Muscular System Development and Function	thickness of compact bone	0.0289	Increased	2	4	Early
Cell Death and Survival	cell death of neuroblastoma cell lines	0.0297	Decreased	-2.269	11	Early
Nucleic Acid Metabolism	metabolism of nucleotide	0.0306	Increased	2.136	25	Early
Small Molecule Biochemistry	metabolism of nucleotide	0.0306	Increased	2.136	25	Early
Cell Death and Survival	cell death of tumor cell lines	8.06e-10	Decreased	-2.007	107	Late
Cellular Development	proliferation of tumor cell lines	1.26e-09	Increased	4.338	107	Late
Cellular Growth and Proliferation	proliferation of tumor cell lines	1.26e-09	Increased	4.338	107	Late
Cellular Assembly and Organization	organization of cytoskeleton	2.23e-09	Increased	2.3	94	Late
Cellular Function and Maintenance	organization of cytoskeleton	2.23e-09	Increased	2.3	94	Late
Protein Synthesis	metabolism of protein	3.34e-09	Increased	2.542	72	Late
Cellular Assembly and Organization	organization of cytoplasm	5.1e-09	Increased	2.274	100	Late
Cellular Function and Maintenance	organization of cytoplasm	5.1e-09	Increased	2.274	100	Late
Cellular Movement	cell movement of tumor cell lines	9.23e-09	Increased	3.509	62	Late
Cellular Movement	migration of tumor cell lines	1.14e-08	Increased	3.531	52	Late
Gene Expression	expression of RNA	1.48e-08	Increased	3.014	143	Late
Protein Synthesis	synthesis of protein	1.72e-08	Increased	2.09	43	Late
Cell Death and Survival	cell viability of tumor cell lines	7.37e-08	Increased	4.762	59	Late
Cell Death and Survival	cell death	2.08e-07	Decreased	-2.02	196	Late
Cell Death and Survival	apoptosis	2.49e-07	Decreased	-2.364	163	Late
Cellular Growth and Proliferation	proliferation of cells	3.08e-07	Increased	5.073	206	Late
Gene Expression	transcription	3.4e-07	Increased	3.155	126	Late
Cell Death and Survival	necrosis	9.55e-07	Decreased	-2.225	154	Late
Gene Expression	transcription of RNA	1.14e-06	Increased	2.864	122	Late
Cell Death and Survival	cell survival	3.07e-06	Increased	5.713	89	Late
Cellular Movement	migration of cells	4.43e-06	Increased	4.781	113	Late
Cell Death and Survival	cell viability	4.9e-06	Increased	5.655	83	Late
Organismal Survival	organismal death	5.15e-06	Decreased	-5.994	106	Late
Cellular Assembly and Organization	formation of cellular protrusions	7.93e-06	Increased	2.371	56	Late
Cellular Function and Maintenance	formation of cellular protrusions	7.93e-06	Increased	2.371	56	Late
Cell Morphology	formation of cellular protrusions	7.93e-06	Increased	2.371	56	Late
Cellular Movement	cell movement	9.2e-06	Increased	4.893	122	Late
Cancer	transformation of fibroblast cell lines	1.04e-05	Increased	3.299	27	Late
Cellular Development	proliferation of breast cancer cell lines	2.67e-05	Increased	2.975	33	Late
Cellular Growth and Proliferation	proliferation of breast cancer cell lines	2.67e-05	Increased	2.975	33	Late
Infectious Disease	Viral Infection	2.81e-05	Increased	7.405	108	Late
Cancer	cell transformation	3.38e-05	Increased	2.825	40	Late
Infectious Disease	HIV infection	3.85e-05	Increased	6.4	55	Late
Infectious Disease	infection of cells	4.58e-05	Increased	6.782	62	Late
Infectious Disease	infection by HIV-1	5.87e-05	Increased	6.249	50	Late
Cellular Movement	cell movement of fibroblast cell lines	0.000104	Increased	2.694	16	Late
Connective Tissue Development and Function	cell movement of fibroblast cell lines	0.000104	Increased	2.694	16	Late
Cellular Development	proliferation of fibroblast cell lines	0.000122	Increased	2.561	34	Late
Cellular Growth and Proliferation	proliferation of fibroblast cell lines	0.000122	Increased	2.561	34	Late
Connective Tissue Development and Function	proliferation of fibroblast cell lines	0.000122	Increased	2.561	34	Late
Tissue Development	adhesion of tumor cell lines	0.000148	Increased	3.392	23	Late
Cell-To-Cell Signaling and Interaction	adhesion of tumor cell lines	0.000148	Increased	3.392	23	Late
Infectious Disease	infection of kidney cell lines	0.000202	Increased	4.692	26	Late
Renal and Urological Disease	infection of kidney cell lines	0.000202	Increased	4.692	26	Late
Molecular Transport	transport of molecule	0.000214	Increased	2.054	79	Late
Cellular Movement	scattering of cells	0.000247	Increased	2.377	10	Late
Infectious Disease	infection of embryonic cell lines	0.000277	Increased	4.598	25	Late
Organismal Injury and Abnormalities	infection of embryonic cell lines	0.000277	Increased	4.598	25	Late
Infectious Disease	infection of epithelial cell lines	0.000277	Increased	4.598	25	Late
Dermatological Diseases and Conditions	infection of epithelial cell lines	0.000277	Increased	4.598	25	Late
Gene Expression	expression of DNA	0.000283	Increased	2.302	93	Late
Cellular Function and Maintenance	cellular homeostasis	0.000315	Increased	2.51	85	Late
Embryonic Development	size of embryo	0.000413	Increased	4.556	27	Late
Cellular Movement	invasion of tumor cell lines	0.000445	Increased	2.445	37	Late
Tissue Development	development of muscle	0.000631	Increased	2.706	28	Late
Embryonic Development	development of muscle	0.000631	Increased	2.706	28	Late
Organismal Development	development of muscle	0.000631	Increased	2.706	28	Late
Skeletal and Muscular System Development and Function	development of muscle	0.000631	Increased	2.706	28	Late
Organ Development	development of muscle	0.000631	Increased	2.706	28	Late
Tissue Development	eye development	0.000644	Decreased	-2.138	32	Late
Embryonic Development	eye development	0.000644	Decreased	-2.138	32	Late
Organismal Development	eye development	0.000644	Decreased	-2.138	32	Late
Organ Development	eye development	0.000644	Decreased	-2.138	32	Late
Visual System Development and Function	eye development	0.000644	Decreased	-2.138	32	Late
Cellular Movement	invasion of breast cancer cell lines	0.000898	Increased	2.393	17	Late
Cellular Development	proliferation of lung cancer cell lines	0.00154	Increased	2.842	19	Late
Cellular Growth and Proliferation	proliferation of lung cancer cell lines	0.00154	Increased	2.842	19	Late
Cellular Development	differentiation of tumor cell lines	0.00164	Increased	2.127	28	Late
Cell Morphology	cell spreading of fibroblasts	0.00175	Increased	2	5	Late
Connective Tissue Development and Function	cell spreading of fibroblasts	0.00175	Increased	2	5	Late
Cell Death and Survival	cell viability of carcinoma cell lines	0.00184	Increased	2.596	8	Late
Tissue Morphology	quantity of cells	0.00192	Increased	2.327	99	Late
Infectious Disease	replication of RNA virus	0.0022	Increased	3.508	35	Late
Cellular Movement	migration of connective tissue cells	0.00222	Increased	2.218	14	Late
Cellular Growth and Proliferation	colony formation of fibroblast cell lines	0.0026	Increased	2.177	10	Late
Connective Tissue Development and Function	colony formation of fibroblast cell lines	0.0026	Increased	2.177	10	Late
Hematological Disease	anemia	0.00276	Decreased	-2.138	23	Late
Cell Death and Survival	apoptosis of myeloma cell lines	0.00301	Decreased	-2.157	8	Late
Cellular Movement	migration of leukemia cell lines	0.00301	Increased	2.596	8	Late
Cellular Development	differentiation of red blood cells	0.00335	Increased	2.138	12	Late
Hematological System Development and Function	differentiation of red blood cells	0.00335	Increased	2.138	12	Late
Hematopoiesis	differentiation of red blood cells	0.00335	Increased	2.138	12	Late
Organismal Development	growth of organism	0.00379	Increased	2.787	34	Late
Cell Death and Survival	cell viability of lung cancer cell lines	0.00384	Increased	2.421	7	Late
Cellular Development	differentiation of cells	0.00425	Increased	3.05	107	Late
Cellular Development	proliferation of prostate cancer cell lines	0.00615	Increased	3.237	18	Late
Cellular Growth and Proliferation	proliferation of prostate cancer cell lines	0.00615	Increased	3.237	18	Late
Infectious Disease	replication of virus	0.00623	Increased	3.521	36	Late
Cell Morphology	cell spreading	0.00739	Increased	2.92	19	Late
