# Supplementary material for: Molecular Profiling of Premalignant Lesions in Lung Squamous Cell Carcinomas Identifies Mechanisms Involved in Stepwise Carcinogenesis
Source: Oxford University Press journal article supplement (doi:10.1158/1940-6207.capr-13-0372), 2014-03-11
Supplement: 19406207capr130372-sup-tab5.xls [file 19406207capr130372-sup-tab5.xls]

## Sheet: Sheet0
Supplementary Table S5
Ensembl ID	Gene Symbol	Prediction of MYC activity	Effect of MYC on gene (# of supportive literature findings)
ENSG00000128016	ZFP36	Activated	Downregulates (2)
ENSG00000165637	VDAC2	Activated	Upregulates (1)
ENSG00000072274	TFRC	Activated	Upregulates (13)
ENSG00000178691	SUZ12	Activated	Upregulates (6)
ENSG00000008513	ST3GAL1	Activated	Upregulates (2)
ENSG00000117394	SLC2A1	Activated	Upregulates (6)
ENSG00000105281	SLC1A5	Activated	Upregulates (1)
ENSG00000171863	RPS7	Activated	Upregulates (1)
ENSG00000196262	PPIA	Activated	Upregulates (1)
ENSG00000102144	PGK1	Activated	Upregulates (4)
ENSG00000181163	NPM1	Activated	Upregulates (8)
ENSG00000148773	MKI67	Activated	Upregulates (1)
ENSG00000111142	METAP2	Activated	Upregulates (1)
ENSG00000134333	LDHA	Activated	Upregulates (10)
ENSG00000205420	KRT6A	Activated	Upregulates (1)
ENSG00000136381	IREB2	Activated	Upregulates (9)
ENSG00000205339	IPO7	Activated	Upregulates (7)
ENSG00000159399	HK2	Activated	Upregulates (8)
ENSG00000164032	H2AFZ	Activated	Upregulates (1)
ENSG00000104687	GSR	Activated	Upregulates (2)
ENSG00000148672	GLUD1	Activated	Upregulates (2)
ENSG00000151247	EIF4E	Activated	Upregulates (12)
ENSG00000165732	DDX21	Activated	Upregulates (1)
ENSG00000172115	CYCS	Activated	Upregulates (1)
ENSG00000169679	BUB1	Activated	Upregulates (2)
ENSG00000012048	BRCA1	Activated	Upregulates (1)
ENSG00000130707	ASS1	Activated	Upregulates (3)
ENSG00000148926	ADM	Activated	Upregulates (11)
ENSG00000158710	TAGLN2	Inhibited	Downregulates (1)
ENSG00000112096	SOD2	Inhibited	Downregulates (1)
ENSG00000132646	PCNA	Inhibited	Downregulates (3)
ENSG00000091409	ITGA6	Inhibited	Downregulates (4)
ENSG00000039068	CDH1	Inhibited	Downregulates (13)
ENSG00000138764	CCNG2	Inhibited	Downregulates (2)
ENSG00000126247	CAPNS1	Inhibited	Downregulates (1)
ENSG00000170540	ARL6IP1	Inhibited	Downregulates (1)
ENSG00000156110	ADK	Affected	Regulates (3)
ENSG00000187446	CHP1	Affected	Regulates (3)
ENSG00000115944	COX7A2L	Affected	Regulates (1)
ENSG00000135766	EGLN1	Affected	Regulates (1)
ENSG00000158406	HIST1H4A (includes others)	Affected	Regulates (1)
ENSG00000136826	KLF4	Affected	Regulates (4)
ENSG00000112893	MAN2A1	Affected	Regulates (3)
ENSG00000143033	MTF2	Affected	Regulates (1)
ENSG00000197879	MYO1C	Affected	Regulates (3)
